# Supplementary material for: The influence of surface passivation on electronic energy relaxation dynamics of CdSe and CdSe/CdS nanocrystals studied using visible and near infrared transient absorption spectroscopy
Source: Royal Society of Chemistry journal article supplement (doi:10.1039/c4nr07581a), 2015-01-01
Supplement: c4nr07581a1.pdf [file c4nr07581a1.pdf]

**Supporting Information for:**

**The Influence of Surface Passivation on Electronic Energy Relaxation of CdSe  
and CdSe/CdS Nanocrystals Studied Using Visible and Near Infrared Transient  
Absorption Spectroscopy**

Chongyue Yi and Kenneth L. Knappenberger, Jr.\*

Department of Chemistry and Biochemistry

Florida State University, Tallahassee, FL 32306

[kknappenberger@fsu.edu](mailto:kknappenberger@fsu.edu)

The uniqueness of the four exponential global fitting components of CdSe QDs were investigated by examining the reduced  $\chi^2$  error surfaces of the independent parameters extracted from convergent fits based on a wide range of initial values. Each principle kinetic was fitted though fixing one time constant in a reasonable range and allowing the other time constants to adjust. The fitting was repeated again by changing the value of fixed time constants. The fitting results obtained from the best fits for each sample are summarized in Tables S1-S5.

## 1. 400-nm photon excitation

**Table S1.** Amplitudes and time constants obtained from ground state bleach fitting of different CdSe nanocrystal sizes.

|                     | CdSe-2.34 eV | CdSe-2.24 eV | CdSe-2.17 eV | CdSe-2.10 eV |
|---------------------|--------------|--------------|--------------|--------------|
| A <sub>1</sub>      | -0.317±0.004 | -0.183±0.008 | -0.151±0.02  | -0.124±0.01  |
| A <sub>2</sub>      | -0.243±0.003 | -0.238±0.008 | -0.132±0.02  | -0.137±0.007 |
| A <sub>3</sub>      | -0.440±0.002 | -0.579±0.002 | -0.716±0.007 | -0.739±0.009 |
| t <sub>1</sub> (ps) | 7.23±0.16    | 9.261±0.50   | 23.2±0.48    | 66.4±4.80    |
| t <sub>2</sub> (ps) | 73.5±2.6     | 51.945±2.5   | 143±30.6     | 402±64.0     |
| t <sub>3</sub> (ps) | 5980±111     | 7884.683±118 | 8911±423     | 6492±225     |

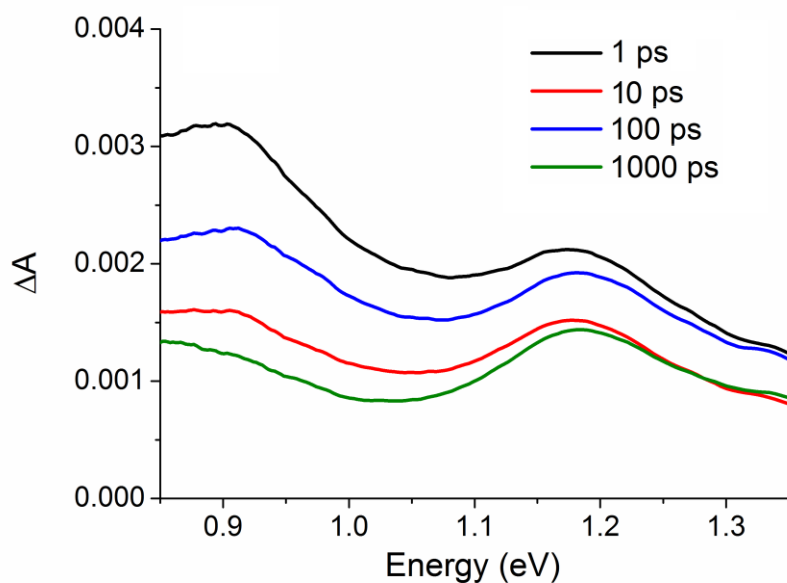

**Figure S1.** NIR transient absorption spectra of CdSe at several different pump-probe delay time after 400 nm excitation (800nJ).

**Table S2.** Time constants obtained from global analysis of CdSe QDs NIR TA spectra.

|            | CdSe-2.34 eV    | CdSe-2.24 eV    | CdSe-2.17 eV    | CdSe-2.10 eV    |
|------------|-----------------|-----------------|-----------------|-----------------|
| $t_1$ (ps) | $2.12\pm 0.208$ | $4.07\pm 1.02$  | $4.65\pm 0.177$ | $3.92\pm 0.279$ |
| $t_2$ (ps) | $13.9\pm 0.271$ | $31.53\pm 1.51$ | $28.7\pm 1.16$  | $29.7\pm 14.7$  |
| $t_3$ (ps) | $128\pm 40.2$   | $299\pm 28.8$   | $179\pm 25.5$   | $199\pm 46.8$   |
| $t_4$ (ps) | $6749\pm 527$   | $6618\pm 1594$  | $9094\pm 1153$  | $6067\pm 785$   |

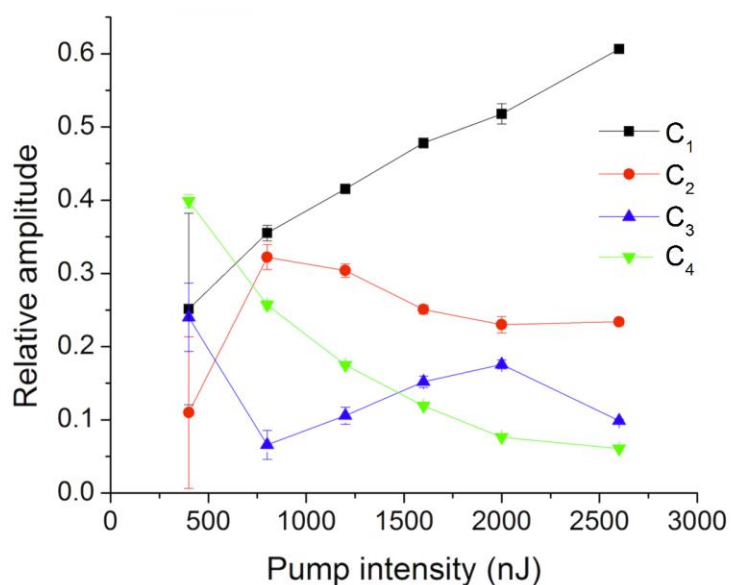**Figure S2.** Excitation energy dependence of relative amplitudes of components extracted from global analysis.**Table S3.** Time constants and amplitude coefficients obtained from global analysis of CdSe/CdS NIR TA spectra.

|            | 1ML              | 3ML              | 5ML              |
|------------|------------------|------------------|------------------|
| $A_1$      | $0.205\pm 0.06$  | $0.363\pm 0.025$ | $0.400\pm 0.087$ |
| $A_2$      | $0.327\pm 0.029$ | $0.381\pm 0.028$ | $0.413\pm 0.037$ |
| $A_3$      | $0.468\pm 0.032$ | $0.257\pm 0.017$ | $0.187\pm 0.056$ |
| $t_1$ (ps) | $6.83\pm 0.772$  | $8.73\pm 1.71$   | $6.50\pm 0.58$   |
| $t_2$ (ps) | $80.9\pm 0.794$  | $96.3\pm 8.24$   | $72.8\pm 2.91$   |
| $t_3$ (ps) | $8876\pm 423$    | $49219\pm 869$   | $1973\pm 453$    |

## 2. 530-nm photon excitation.

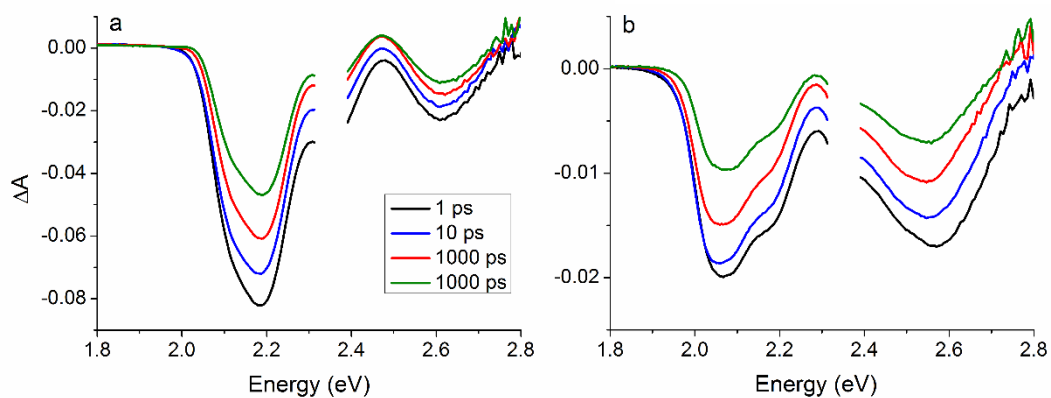

**Figure S3.** Visible transient absorption spectra of (a) CdSe and (b) CdSe/CdS-3ML NCs at different pump-probe delay time after 530 nm excitation (500nJ).

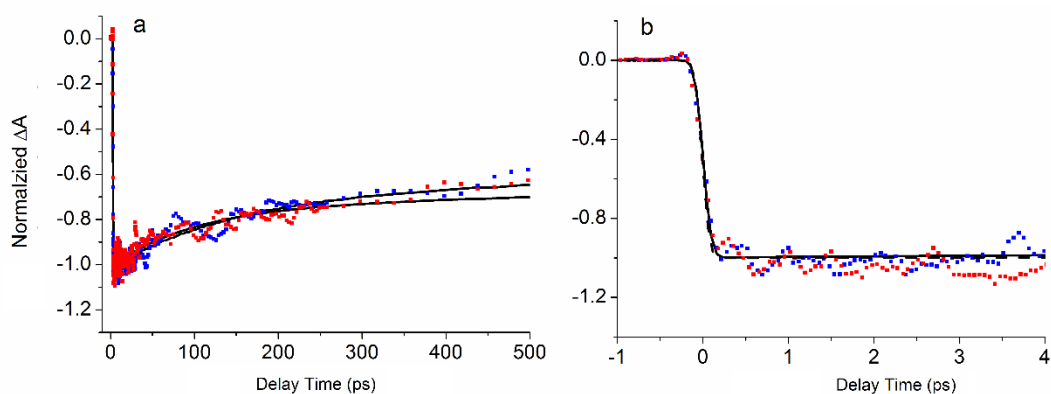

**Figure S4.** Bleach recovery kinetics of CdSe (blue) and CdSe/CdS-3ML (red) NCs at different under 530 nm excitation (500nJ).

**Table S4.** Amplitudes and time constants obtained from ground state bleach fitting of CdSe core and CdSe/CdS core/shell QDs.

|            | CdSe core          | CdSe/CdS-3ML       |
|------------|--------------------|--------------------|
| $A_1$      | $-0.257 \pm 0.032$ | $-0.344 \pm 0.012$ |
| $A_2$      | $-0.743 \pm 0.032$ | $-0.656 \pm 0.012$ |
| $t_1$ (ps) | $82.3 \pm 15.4$    | $160 \pm 21.1$     |
| $t_2$ (ps) | $6883 \pm 1321$    | $7750 \pm 553$     |

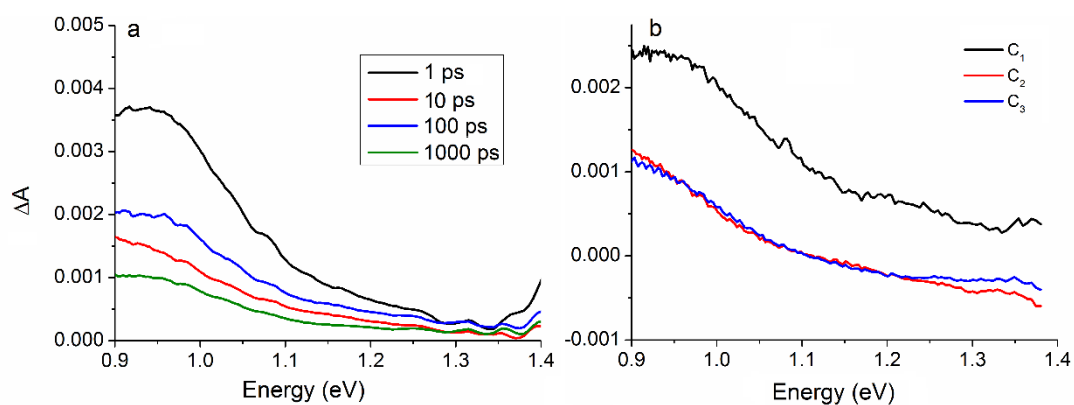

**Figure S5.** (a) NIR transient absorption spectra of CdSe/CdS-3ML NCs at different pump-probe delay time after 530 nm excitation (500nJ). (b) Decomposition of the NIR transient absorption spectra of the CdSe/CdS-3ML under 530nm excitation.

**Table S5.** Time constants and amplitude coefficients obtained from global analysis of CdSe/CdS-3ML NIR TA spectra under 530 nm excitation.

| 3ML   |                   |                  |                 |
|-------|-------------------|------------------|-----------------|
| $A_1$ | $0.497 \pm 0.057$ | $t_1(\text{ps})$ | $2.54 \pm 0.48$ |
| $A_2$ | $0.245 \pm 0.037$ | $t_2(\text{ps})$ | $69.7 \pm 9.84$ |
| $A_3$ | $0.258 \pm 0.031$ | $t_3(\text{ns})$ | $14.5 \pm 4.8$  |
